## Correction: CLCA4 inhibits bladder cancer cell proliferation, migration, and invasion by suppressing the PI3K/AKT pathway

Teng Hou<sup>1,\*</sup>, Lijie Zhou<sup>1,\*</sup>, Longwang Wang<sup>1,2</sup>, Gallina Kazobinka<sup>1</sup>, Xiaoping Zhang<sup>1</sup> and Zhaohui Chen<sup>1</sup>

<sup>1</sup> Department of Urology, Union Hospital, Tongji Medical College, Huazhong University of Science and Technology, Wuhan 430022, China

<sup>2</sup> Department of Urology, The Second Affiliated Hospital of Nanchang University, Nanchang, Jiangxi 330008, China

\* These authors have contributed equally to this work

**Published:** January 29, 2019

**Copyright:** Hou et al. This is an open-access article distributed under the terms of the Creative Commons Attribution License 3.0 (CC BY 3.0), which permits unrestricted use, distribution, and reproduction in any medium, provided the original author and source are credited.

**This article has been corrected:** The correct affiliation information is given below:

<sup>1</sup> Department of Urology, Union Hospital, Tongji Medical College, Huazhong University of Science and Technology, Wuhan 430022, China

Original article: Oncotarget. 2017; 8:93001-93013. <https://doi.org/10.18632/oncotarget.21724>
